# Supplementary material for: Brown Seaweed Extract (BSE) Application Influences Auxin- and ABA-Related Gene Expression, Root Development, and Sugar Yield in Beta vulgaris L
Source: MDPI journal article supplement (doi:10.3390/plants12040843), 2023-02-13
Supplement: s1 [file s1]

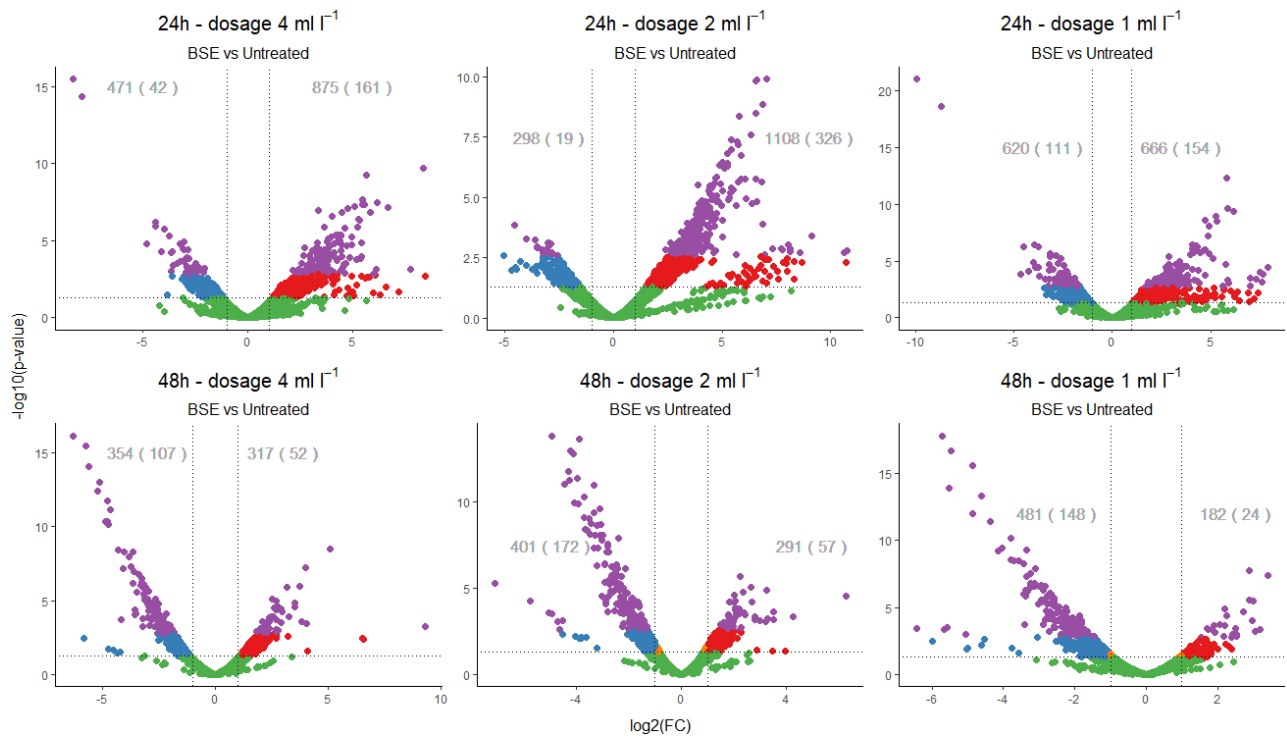

**Figure S1.** Volcano plots showing DEG genes (p-value<0.05) at 24 h and 48 h after BSE treatment, for each tested BSE concentration. Green and orange dots are genes not DE for the p-value or the FC; Red dots are up-regulated genes (p-value<0.05); Blue dots are down-regulated genes (p-value < 0.05); Purple dots are genes DE according to the adjusted p-value (p-adj<0.1).

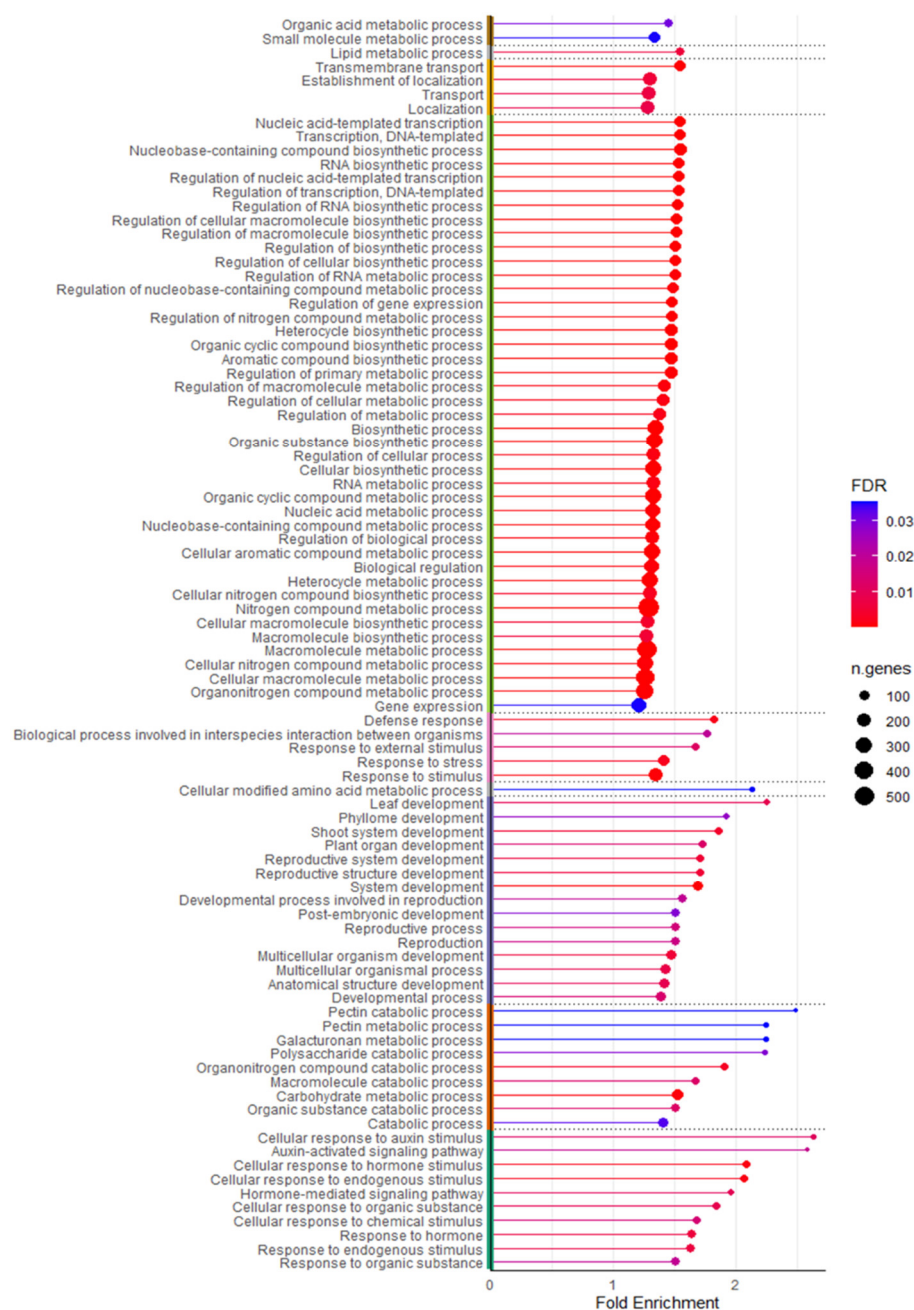

**Figure S2.** Enrichment chart showing fold enrichment analysis of GO biological processes for up-regulated genes after ANE treatment. The cluster analysis based on similarity is also reported, and a dashed line separates each homogeneous group. In each cluster, pathways are in descending order.

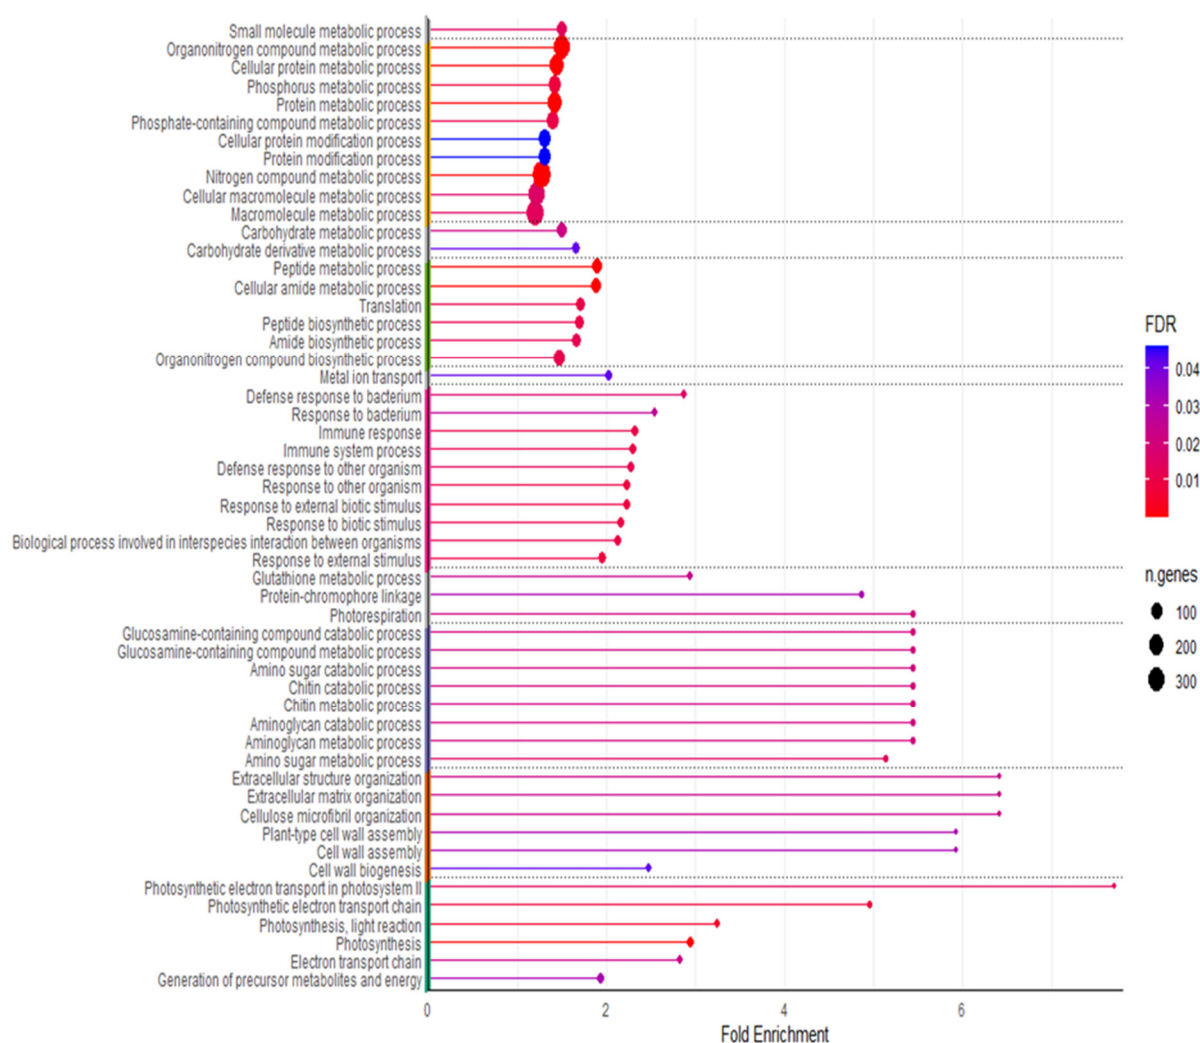

**Figure S3.** Enrichment chart showing fold enrichment analysis of GO biological processes for down-regulated genes after ANE treatment. The cluster analysis based on similarity is also reported, and each homogeneous group is separated by a dashed line. In each cluster, pathways are in descending order.

## One Way Analysis of Variance

Dependent Variable: PYL4

Equal Variance Test (Brown-Forsythe): Passed (P = 0,057)

| Group Name                | N | Missing | Mean  | Std Dev | SEM    |
|---------------------------|---|---------|-------|---------|--------|
| 0 ml l <sup>-1</sup> 24 h | 9 | 0       | 0,766 | 0,153   | 0,0511 |
| 0 ml l <sup>-1</sup> 48 h | 9 | 0       | 0,857 | 0,239   | 0,0797 |
| 4 ml l <sup>-1</sup> 24 h | 9 | 0       | 1,386 | 0,297   | 0,0989 |
| 4 ml l <sup>-1</sup> 48 h | 9 | 0       | 1,312 | 0,295   | 0,0982 |
| 2 ml l <sup>-1</sup> 24 h | 9 | 0       | 0,593 | 0,114   | 0,0379 |
| 2 ml l <sup>-1</sup> 48 h | 9 | 0       | 0,421 | 0,0752  | 0,0251 |
| 1 ml l <sup>-1</sup> 24 h | 9 | 0       | 0,479 | 0,161   | 0,0537 |
| 1 ml l <sup>-1</sup> 48 h | 9 | 0       | 0,730 | 0,142   | 0,0474 |

| Source of Variation | DF | SS     | MS     | F      | P      |
|---------------------|----|--------|--------|--------|--------|
| Between Groups      | 7  | 8,112  | 1,159  | 28,957 | <0,001 |
| Residual            | 64 | 2,561  | 0,0400 |        |        |
| Total               | 71 | 10,674 |        |        |        |

The differences in the mean values among the treatment groups are greater than would be expected by chance; there is a statistically significant difference (P = <0,001).

Power of performed test with alpha = 0,050: 1,000

All Pairwise Multiple Comparison Procedures (Duncan's Method):

Comparisons for factor: **Treatment**

| Comparison                                          | Diff of Means | p | q      | P      | P<0,050 |
|-----------------------------------------------------|---------------|---|--------|--------|---------|
| 4 ml l <sup>-1</sup> 24 vs. 2 ml l <sup>-1</sup> 48 | 0,964         | 8 | 14,463 | <0,001 | Yes     |
| 4 ml l <sup>-1</sup> 24 vs. 1 ml l <sup>-1</sup> 24 | 0,907         | 7 | 13,596 | <0,001 | Yes     |
| 4 ml l <sup>-1</sup> 24 vs. 2 ml l <sup>-1</sup> 24 | 0,792         | 6 | 11,880 | <0,001 | Yes     |
| 4 ml l <sup>-1</sup> 24 vs. 1 ml l <sup>-1</sup> 48 | 0,656         | 5 | 9,831  | <0,001 | Yes     |
| 4 ml l <sup>-1</sup> 24 vs. 0 ml l <sup>-1</sup> 24 | 0,620         | 4 | 9,297  | <0,001 | Yes     |
| 4 ml l <sup>-1</sup> 24 vs. 0 ml l <sup>-1</sup> 48 | 0,529         | 3 | 7,931  | <0,001 | Yes     |
| 4 ml l <sup>-1</sup> 24 vs. 4 ml l <sup>-1</sup> 48 | 0,0733        | 2 | 1,100  | 0,440  | No      |
| 4 ml l <sup>-1</sup> 48 vs. 2 ml l <sup>-1</sup> 48 | 0,891         | 7 | 13,363 | <0,001 | Yes     |
| 4 ml l <sup>-1</sup> 48 vs. 1 ml l <sup>-1</sup> 24 | 0,833         | 6 | 12,497 | <0,001 | Yes     |
| 4 ml l <sup>-1</sup> 48 vs. 2 ml l <sup>-1</sup> 24 | 0,719         | 5 | 10,780 | <0,001 | Yes     |
| 4 ml l <sup>-1</sup> 48 vs. 1 ml l <sup>-1</sup> 48 | 0,582         | 4 | 8,731  | <0,001 | Yes     |
| 4 ml l <sup>-1</sup> 48 vs. 0 ml l <sup>-1</sup> 24 | 0,547         | 3 | 8,198  | <0,001 | Yes     |

|                         |                             |        |   |       |        |             |
|-------------------------|-----------------------------|--------|---|-------|--------|-------------|
| 4 ml l <sup>-1</sup> 48 | vs. 0 ml l <sup>-1</sup> 48 | 0,456  | 2 | 6,831 | <0,001 | Yes         |
| 0 ml l <sup>-1</sup> 48 | vs. 2 ml l <sup>-1</sup> 48 | 0,436  | 6 | 6,532 | <0,001 | Yes         |
| 0 ml l <sup>-1</sup> 48 | vs. 1 ml l <sup>-1</sup> 24 | 0,378  | 5 | 5,665 | <0,001 | Yes         |
| 0 ml l <sup>-1</sup> 48 | vs. 2 ml l <sup>-1</sup> 24 | 0,263  | 4 | 3,949 | 0,011  | Yes         |
| 0 ml l <sup>-1</sup> 48 | vs. 1 ml l <sup>-1</sup> 48 | 0,127  | 3 | 1,899 | 0,211  | No          |
| 0 ml l <sup>-1</sup> 48 | vs. 0 ml l <sup>-1</sup> 24 | 0,0911 | 2 | 1,366 | 0,338  | Do Not Test |
| 0 ml l <sup>-1</sup> 24 | vs. 2 ml l <sup>-1</sup> 48 | 0,344  | 5 | 5,165 | 0,001  | Yes         |
| 0 ml l <sup>-1</sup> 24 | vs. 1 ml l <sup>-1</sup> 24 | 0,287  | 4 | 4,299 | 0,006  | Yes         |
| 0 ml l <sup>-1</sup> 24 | vs. 2 ml l <sup>-1</sup> 24 | 0,172  | 3 | 2,583 | 0,089  | No          |
| 0 ml l <sup>-1</sup> 24 | vs. 1 ml l <sup>-1</sup> 48 | 0,0356 | 2 | 0,533 | 0,708  | Do Not Test |
| 1 ml l <sup>-1</sup> 48 | vs. 2 ml l <sup>-1</sup> 48 | 0,309  | 4 | 4,632 | 0,003  | Yes         |
| 1 ml l <sup>-1</sup> 48 | vs. 1 ml l <sup>-1</sup> 24 | 0,251  | 3 | 3,766 | 0,013  | Yes         |
| 1 ml l <sup>-1</sup> 48 | vs. 2 ml l <sup>-1</sup> 24 | 0,137  | 2 | 2,049 | 0,152  | Do Not Test |
| 2 ml l <sup>-1</sup> 24 | vs. 2 ml l <sup>-1</sup> 48 | 0,172  | 3 | 2,583 | 0,089  | No          |
| 2 ml l <sup>-1</sup> 24 | vs. 1 ml l <sup>-1</sup> 24 | 0,114  | 2 | 1,716 | 0,229  | Do Not Test |
| 1 ml l <sup>-1</sup> 24 | vs. 2 ml l <sup>-1</sup> 48 | 0,0578 | 2 | 0,866 | 0,542  | Do Not Test |

A result of "Do Not Test" occurs for a comparison when no significant difference is found between two means that enclose that comparison. For example, if you had four means sorted in order, and found no difference between means 4 vs. 2, then you would not test 4 vs. 3 and 3 vs. 2, but still test 4 vs. 1 and 3 vs. 1 (4 vs. 3 and 3 vs. 2 are enclosed by 4 vs. 2: 4 3 2 1). Note that not testing the enclosed means is a procedural rule, and a result of Do Not Test should be treated as if there is no significant difference between the means, even though one may appear to exist.

## One Way Analysis of Variance

Dependent Variable: PP2C 62

Equal Variance Test (Brown-Forsythe): Passed (P = 0,140)

| Group Name                | N | Missing | Mean  | Std Dev | SEM    |
|---------------------------|---|---------|-------|---------|--------|
| 0 ml l <sup>-1</sup> 24 h | 9 | 0       | 1,044 | 0,565   | 0,188  |
| 0 ml l <sup>-1</sup> 48 h | 9 | 0       | 1,486 | 0,632   | 0,211  |
| 4 ml l <sup>-1</sup> 24 h | 9 | 0       | 1,861 | 0,921   | 0,307  |
| 4 ml l <sup>-1</sup> 48 h | 9 | 0       | 2,554 | 0,884   | 0,295  |
| 2 ml l <sup>-1</sup> 24 h | 9 | 0       | 0,901 | 0,308   | 0,103  |
| 2 ml l <sup>-1</sup> 48 h | 9 | 0       | 0,627 | 0,226   | 0,0752 |
| 1 ml l <sup>-1</sup> 24 h | 9 | 0       | 1,870 | 0,995   | 0,332  |
| 1 ml l <sup>-1</sup> 48 h | 9 | 0       | 1,811 | 0,874   | 0,291  |

| Source of Variation | DF | SS     | MS    | F     | P      |
|---------------------|----|--------|-------|-------|--------|
| Between Groups      | 7  | 25,219 | 3,603 | 6,784 | <0,001 |
| Residual            | 64 | 33,988 | 0,531 |       |        |
| Total               | 71 | 59,207 |       |       |        |

The differences in the mean values among the treatment groups are greater than would be expected by chance; there is a statistically significant difference (P = <0,001).

Power of performed test with alpha = 0,050: 0,998

All Pairwise Multiple Comparison Procedures (Duncan's Method):

Comparisons for factor: **Treatment**

| Comparison                                          | Diff of Means | p | q     | P      | P<0,050     |
|-----------------------------------------------------|---------------|---|-------|--------|-------------|
| 4 ml l <sup>-1</sup> 48 vs. 2 ml l <sup>-1</sup> 48 | 1,928         | 8 | 7,936 | <0,001 | Yes         |
| 4 ml l <sup>-1</sup> 48 vs. 2 ml l <sup>-1</sup> 24 | 1,653         | 7 | 6,806 | <0,001 | Yes         |
| 4 ml l <sup>-1</sup> 48 vs. 0 ml l <sup>-1</sup> 24 | 1,510         | 6 | 6,216 | <0,001 | Yes         |
| 4 ml l <sup>-1</sup> 48 vs. 0 ml l <sup>-1</sup> 48 | 1,069         | 5 | 4,400 | 0,006  | Yes         |
| 4 ml l <sup>-1</sup> 48 vs. 1 ml l <sup>-1</sup> 48 | 0,743         | 4 | 3,060 | 0,051  | No          |
| 4 ml l <sup>-1</sup> 48 vs. 4 ml l <sup>-1</sup> 24 | 0,693         | 3 | 2,854 | 0,060  | Do Not Test |
| 4 ml l <sup>-1</sup> 48 vs. 1 ml l <sup>-1</sup> 24 | 0,684         | 2 | 2,818 | 0,051  | Do Not Test |
| 1 ml l <sup>-1</sup> 24 vs. 2 ml l <sup>-1</sup> 48 | 1,243         | 7 | 5,118 | 0,002  | Yes         |
| 1 ml l <sup>-1</sup> 24 vs. 2 ml l <sup>-1</sup> 24 | 0,969         | 6 | 3,989 | 0,014  | Yes         |
| 1 ml l <sup>-1</sup> 24 vs. 0 ml l <sup>-1</sup> 24 | 0,826         | 5 | 3,399 | 0,034  | Yes         |
| 1 ml l <sup>-1</sup> 24 vs. 0 ml l <sup>-1</sup> 48 | 0,384         | 4 | 1,583 | 0,315  | No          |
| 1 ml l <sup>-1</sup> 24 vs. 1 ml l <sup>-1</sup> 48 | 0,0589        | 3 | 0,242 | 0,874  | Do Not Test |

|                                                     |         |   |        |       |             |
|-----------------------------------------------------|---------|---|--------|-------|-------------|
| 1 ml l <sup>-1</sup> 24 vs. 4 ml l <sup>-1</sup> 24 | 0,00889 | 2 | 0,0366 | 0,980 | Do Not Test |
| 4 ml l <sup>-1</sup> 24 vs. 2 ml l <sup>-1</sup> 48 | 1,234   | 6 | 5,082  | 0,002 | Yes         |
| 4 ml l <sup>-1</sup> 24 vs. 2 ml l <sup>-1</sup> 24 | 0,960   | 5 | 3,952  | 0,013 | Yes         |
| 4 ml l <sup>-1</sup> 24 vs. 0 ml l <sup>-1</sup> 24 | 0,817   | 4 | 3,362  | 0,032 | Yes         |
| 4 ml l <sup>-1</sup> 24 vs. 0 ml l <sup>-1</sup> 48 | 0,376   | 3 | 1,546  | 0,308 | Do Not Test |
| 4 ml l <sup>-1</sup> 24 vs. 1 ml l <sup>-1</sup> 48 | 0,0500  | 2 | 0,206  | 0,885 | Do Not Test |
| 1 ml l <sup>-1</sup> 48 vs. 2 ml l <sup>-1</sup> 48 | 1,184   | 5 | 4,876  | 0,002 | Yes         |
| 1 ml l <sup>-1</sup> 48 vs. 2 ml l <sup>-1</sup> 24 | 0,910   | 4 | 3,746  | 0,017 | Yes         |
| 1 ml l <sup>-1</sup> 48 vs. 0 ml l <sup>-1</sup> 24 | 0,767   | 3 | 3,156  | 0,037 | Yes         |
| 1 ml l <sup>-1</sup> 48 vs. 0 ml l <sup>-1</sup> 48 | 0,326   | 2 | 1,340  | 0,347 | Do Not Test |
| 0 ml l <sup>-1</sup> 48 vs. 2 ml l <sup>-1</sup> 48 | 0,859   | 4 | 3,536  | 0,024 | Yes         |
| 0 ml l <sup>-1</sup> 48 vs. 2 ml l <sup>-1</sup> 24 | 0,584   | 3 | 2,406  | 0,113 | No          |
| 0 ml l <sup>-1</sup> 48 vs. 0 ml l <sup>-1</sup> 24 | 0,441   | 2 | 1,816  | 0,204 | Do Not Test |
| 0 ml l <sup>-1</sup> 24 vs. 2 ml l <sup>-1</sup> 48 | 0,418   | 3 | 1,720  | 0,257 | No          |
| 0 ml l <sup>-1</sup> 24 vs. 2 ml l <sup>-1</sup> 24 | 0,143   | 2 | 0,590  | 0,678 | Do Not Test |
| 2 ml l <sup>-1</sup> 24 vs. 2 ml l <sup>-1</sup> 48 | 0,274   | 2 | 1,130  | 0,427 | Do Not Test |

A result of "Do Not Test" occurs for a comparison when no significant difference is found between two means that enclose that comparison. For example, if you had four means sorted in order, and found no difference between means 4 vs. 2, then you would not test 4 vs. 3 and 3 vs. 2, but still test 4 vs. 1 and 3 vs. 1 (4 vs. 3 and 3 vs. 2 are enclosed by 4 vs. 2: 4 3 2 1). Note that not testing the enclosed means is a procedural rule, and a result of Do Not Test should be treated as if there is no significant difference between the means, even though one may appear to exist.

## One Way Analysis of Variance

Dependent Variable: MYB23

Equal Variance Test (Brown-Forsythe): Passed (P = 0,182)

| Group Name                | N | Missing | Mean  | Std Dev | SEM    |
|---------------------------|---|---------|-------|---------|--------|
| 0 ml l <sup>-1</sup> 24 h | 9 | 0       | 0,588 | 0,247   | 0,0824 |
| 0 ml l <sup>-1</sup> 48 h | 9 | 0       | 0,964 | 0,633   | 0,211  |
| 4 ml l <sup>-1</sup> 24 h | 9 | 0       | 0,934 | 0,186   | 0,0620 |
| 4 ml l <sup>-1</sup> 48 h | 9 | 0       | 1,744 | 0,914   | 0,305  |
| 2 ml l <sup>-1</sup> 24 h | 9 | 0       | 2,394 | 0,671   | 0,224  |
| 2 ml l <sup>-1</sup> 48 h | 9 | 0       | 1,796 | 0,821   | 0,274  |
| 1 ml l <sup>-1</sup> 24 h | 9 | 0       | 1,277 | 0,718   | 0,239  |
| 1 ml l <sup>-1</sup> 48 h | 9 | 0       | 1,127 | 0,938   | 0,313  |

| Source of Variation | DF | SS     | MS    | F     | P      |
|---------------------|----|--------|-------|-------|--------|
| Between Groups      | 7  | 21,622 | 3,089 | 6,418 | <0,001 |
| Residual            | 64 | 30,804 | 0,481 |       |        |
| Total               | 71 | 52,426 |       |       |        |

The differences in the mean values among the treatment groups are greater than would be expected by chance; there is a statistically significant difference (P = <0,001).

Power of performed test with alpha = 0,050: 0,997

All Pairwise Multiple Comparison Procedures (Duncan's Method) :

Comparisons for factor: **Treatment**

| Comparison                                          | Diff of Means | p | q     | P      | P<0,050     |
|-----------------------------------------------------|---------------|---|-------|--------|-------------|
| 2 ml l <sup>-1</sup> 24 vs. 0 ml l <sup>-1</sup> 24 | 1,807         | 8 | 7,812 | <0,001 | Yes         |
| 2 ml l <sup>-1</sup> 24 vs. 4 ml l <sup>-1</sup> 24 | 1,460         | 7 | 6,313 | <0,001 | Yes         |
| 2 ml l <sup>-1</sup> 24 vs. 0 ml l <sup>-1</sup> 48 | 1,430         | 6 | 6,184 | <0,001 | Yes         |
| 2 ml l <sup>-1</sup> 24 vs. 1 ml l <sup>-1</sup> 48 | 1,268         | 5 | 5,482 | <0,001 | Yes         |
| 2 ml l <sup>-1</sup> 24 vs. 1 ml l <sup>-1</sup> 24 | 1,118         | 4 | 4,834 | 0,002  | Yes         |
| 2 ml l <sup>-1</sup> 24 vs. 4 ml l <sup>-1</sup> 48 | 0,650         | 3 | 2,811 | 0,064  | No          |
| 2 ml l <sup>-1</sup> 24 vs. 2 ml l <sup>-1</sup> 48 | 0,599         | 2 | 2,590 | 0,072  | Do Not Test |
| 2 ml l <sup>-1</sup> 48 vs. 0 ml l <sup>-1</sup> 24 | 1,208         | 7 | 5,223 | 0,001  | Yes         |
| 2 ml l <sup>-1</sup> 48 vs. 4 ml l <sup>-1</sup> 24 | 0,861         | 6 | 3,724 | 0,022  | Yes         |
| 2 ml l <sup>-1</sup> 48 vs. 0 ml l <sup>-1</sup> 48 | 0,831         | 5 | 3,594 | 0,024  | Yes         |
| 2 ml l <sup>-1</sup> 48 vs. 1 ml l <sup>-1</sup> 48 | 0,669         | 4 | 2,892 | 0,065  | No          |
| 2 ml l <sup>-1</sup> 48 vs. 1 ml l <sup>-1</sup> 24 | 0,519         | 3 | 2,244 | 0,139  | Do Not Test |



|                                                     |        |   |       |       |             |
|-----------------------------------------------------|--------|---|-------|-------|-------------|
| 2 ml l <sup>-1</sup> 48 vs. 4 ml l <sup>-1</sup> 48 | 0,0511 | 2 | 0,221 | 0,876 | Do Not Test |
| 4 ml l <sup>-1</sup> 48 vs. 0 ml l <sup>-1</sup> 24 | 1,157  | 6 | 5,002 | 0,002 | Yes         |
| 4 ml l <sup>-1</sup> 48 vs. 4 ml l <sup>-1</sup> 24 | 0,810  | 5 | 3,503 | 0,028 | Yes         |
| 4 ml l <sup>-1</sup> 48 vs. 0 ml l <sup>-1</sup> 48 | 0,780  | 4 | 3,373 | 0,031 | Yes         |
| 4 ml l <sup>-1</sup> 48 vs. 1 ml l <sup>-1</sup> 48 | 0,618  | 3 | 2,671 | 0,078 | Do Not Test |
| 4 ml l <sup>-1</sup> 48 vs. 1 ml l <sup>-1</sup> 24 | 0,468  | 2 | 2,023 | 0,158 | Do Not Test |
| 1 ml l <sup>-1</sup> 24 vs. 0 ml l <sup>-1</sup> 24 | 0,689  | 5 | 2,979 | 0,063 | No          |
| 1 ml l <sup>-1</sup> 24 vs. 4 ml l <sup>-1</sup> 24 | 0,342  | 4 | 1,480 | 0,348 | Do Not Test |
| 1 ml l <sup>-1</sup> 24 vs. 0 ml l <sup>-1</sup> 48 | 0,312  | 3 | 1,350 | 0,374 | Do Not Test |
| 1 ml l <sup>-1</sup> 24 vs. 1 ml l <sup>-1</sup> 48 | 0,150  | 2 | 0,649 | 0,648 | Do Not Test |
| 1 ml l <sup>-1</sup> 48 vs. 0 ml l <sup>-1</sup> 24 | 0,539  | 4 | 2,330 | 0,138 | Do Not Test |
| 1 ml l <sup>-1</sup> 48 vs. 4 ml l <sup>-1</sup> 24 | 0,192  | 3 | 0,831 | 0,584 | Do Not Test |
| 1 ml l <sup>-1</sup> 48 vs. 0 ml l <sup>-1</sup> 48 | 0,162  | 2 | 0,701 | 0,622 | Do Not Test |
| 0 ml l <sup>-1</sup> 48 vs. 0 ml l <sup>-1</sup> 24 | 0,377  | 3 | 1,629 | 0,283 | Do Not Test |
| 0 ml l <sup>-1</sup> 48 vs. 4 ml l <sup>-1</sup> 24 | 0,0300 | 2 | 0,130 | 0,927 | Do Not Test |
| 4 ml l <sup>-1</sup> 24 vs. 0 ml l <sup>-1</sup> 24 | 0,347  | 2 | 1,499 | 0,293 | Do Not Test |

A result of "Do Not Test" occurs for a comparison when no significant difference is found between two means that enclose that comparison. For example, if you had four means sorted in order, and found no difference between means 4 vs. 2, then you would not test 4 vs. 3 and 3 vs. 2, but still test 4 vs. 1 and 3 vs. 1 (4 vs. 3 and 3 vs. 2 are enclosed by 4 vs. 2: 4 3 2 1). Note that not testing the enclosed means is a procedural rule, and a result of Do Not Test should be treated as if there is no significant difference between the means, even though one may appear to exist.

## One Way Analysis of Variance

Dependent Variable: ARF19

Equal Variance Test (Brown-Forsythe): Failed ( $P < 0,050$ )

| Group Name                | N | Missing | Mean  | Std Dev | SEM    |
|---------------------------|---|---------|-------|---------|--------|
| 0 ml l <sup>-1</sup> 24 h | 9 | 0       | 1,558 | 0,712   | 0,237  |
| 0 ml l <sup>-1</sup> 48 h | 9 | 0       | 1,842 | 0,967   | 0,322  |
| 4 ml l <sup>-1</sup> 24 h | 9 | 0       | 1,962 | 0,371   | 0,124  |
| 4 ml l <sup>-1</sup> 48 h | 9 | 0       | 2,516 | 0,366   | 0,122  |
| 2 ml l <sup>-1</sup> 24 h | 9 | 0       | 1,624 | 0,768   | 0,256  |
| 2 ml l <sup>-1</sup> 48 h | 9 | 0       | 1,439 | 0,445   | 0,148  |
| 1 ml l <sup>-1</sup> 24 h | 9 | 0       | 1,792 | 0,255   | 0,0849 |
| 1 ml l <sup>-1</sup> 48 h | 9 | 0       | 2,288 | 0,439   | 0,146  |

| Source of Variation | DF | SS     | MS    | F     | P     |
|---------------------|----|--------|-------|-------|-------|
| Between Groups      | 7  | 8,548  | 1,221 | 3,541 | 0,003 |
| Residual            | 64 | 22,070 | 0,345 |       |       |
| Total               | 71 | 30,618 |       |       |       |

The differences in the mean values among the treatment groups are greater than would be expected by chance; there is a statistically significant difference ( $P = 0,003$ ).

Power of performed test with  $\alpha = 0,050$ : 0,848

All Pairwise Multiple Comparison Procedures (Duncan's Method) :

Comparisons for factor: **Treatment**

| Comparison                                          | Diff of Means | p | q     | P      | P<0,050     |
|-----------------------------------------------------|---------------|---|-------|--------|-------------|
| 4 ml l <sup>-1</sup> 48 vs. 2 ml l <sup>-1</sup> 48 | 1,077         | 8 | 5,500 | <0,001 | Yes         |
| 4 ml l <sup>-1</sup> 48 vs. 0 ml l <sup>-1</sup> 24 | 0,958         | 7 | 4,893 | 0,003  | Yes         |
| 4 ml l <sup>-1</sup> 48 vs. 2 ml l <sup>-1</sup> 24 | 0,891         | 6 | 4,552 | 0,005  | Yes         |
| 4 ml l <sup>-1</sup> 48 vs. 1 ml l <sup>-1</sup> 24 | 0,723         | 5 | 3,695 | 0,021  | Yes         |
| 4 ml l <sup>-1</sup> 48 vs. 0 ml l <sup>-1</sup> 48 | 0,673         | 4 | 3,440 | 0,028  | Yes         |
| 4 ml l <sup>-1</sup> 48 vs. 4 ml l <sup>-1</sup> 24 | 0,553         | 3 | 2,827 | 0,062  | No          |
| 4 ml l <sup>-1</sup> 48 vs. 1 ml l <sup>-1</sup> 48 | 0,228         | 2 | 1,164 | 0,414  | Do Not Test |
| 1 ml l <sup>-1</sup> 48 vs. 2 ml l <sup>-1</sup> 48 | 0,849         | 7 | 4,337 | 0,008  | Yes         |
| 1 ml l <sup>-1</sup> 48 vs. 0 ml l <sup>-1</sup> 24 | 0,730         | 6 | 3,729 | 0,022  | Yes         |
| 1 ml l <sup>-1</sup> 48 vs. 2 ml l <sup>-1</sup> 24 | 0,663         | 5 | 3,389 | 0,034  | Yes         |
| 1 ml l <sup>-1</sup> 48 vs. 1 ml l <sup>-1</sup> 24 | 0,496         | 4 | 2,532 | 0,107  | No          |
| 1 ml l <sup>-1</sup> 48 vs. 0 ml l <sup>-1</sup> 48 | 0,446         | 3 | 2,276 | 0,133  | Do Not Test |

|                                                     |        |   |       |       |             |
|-----------------------------------------------------|--------|---|-------|-------|-------------|
| 1 ml l <sup>-1</sup> 48 vs. 4 ml l <sup>-1</sup> 24 | 0,326  | 2 | 1,663 | 0,244 | Do Not Test |
| 4 ml l <sup>-1</sup> 24 vs. 2 ml l <sup>-1</sup> 48 | 0,523  | 6 | 2,674 | 0,102 | No          |
| 4 ml l <sup>-1</sup> 24 vs. 0 ml l <sup>-1</sup> 24 | 0,404  | 5 | 2,066 | 0,200 | Do Not Test |
| 4 ml l <sup>-1</sup> 24 vs. 2 ml l <sup>-1</sup> 24 | 0,338  | 4 | 1,726 | 0,273 | Do Not Test |
| 4 ml l <sup>-1</sup> 24 vs. 1 ml l <sup>-1</sup> 24 | 0,170  | 3 | 0,868 | 0,568 | Do Not Test |
| 4 ml l <sup>-1</sup> 24 vs. 0 ml l <sup>-1</sup> 48 | 0,120  | 2 | 0,613 | 0,666 | Do Not Test |
| 0 ml l <sup>-1</sup> 48 vs. 2 ml l <sup>-1</sup> 48 | 0,403  | 5 | 2,061 | 0,202 | Do Not Test |
| 0 ml l <sup>-1</sup> 48 vs. 0 ml l <sup>-1</sup> 24 | 0,284  | 4 | 1,453 | 0,357 | Do Not Test |
| 0 ml l <sup>-1</sup> 48 vs. 2 ml l <sup>-1</sup> 24 | 0,218  | 3 | 1,113 | 0,464 | Do Not Test |
| 0 ml l <sup>-1</sup> 48 vs. 1 ml l <sup>-1</sup> 24 | 0,0500 | 2 | 0,255 | 0,857 | Do Not Test |
| 1 ml l <sup>-1</sup> 24 vs. 2 ml l <sup>-1</sup> 48 | 0,353  | 4 | 1,805 | 0,252 | Do Not Test |
| 1 ml l <sup>-1</sup> 24 vs. 0 ml l <sup>-1</sup> 24 | 0,234  | 3 | 1,198 | 0,430 | Do Not Test |
| 1 ml l <sup>-1</sup> 24 vs. 2 ml l <sup>-1</sup> 24 | 0,168  | 2 | 0,857 | 0,547 | Do Not Test |
| 2 ml l <sup>-1</sup> 24 vs. 2 ml l <sup>-1</sup> 48 | 0,186  | 3 | 0,948 | 0,533 | Do Not Test |
| 2 ml l <sup>-1</sup> 24 vs. 0 ml l <sup>-1</sup> 24 | 0,0667 | 2 | 0,341 | 0,811 | Do Not Test |
| 0 ml l <sup>-1</sup> 24 vs. 2 ml l <sup>-1</sup> 48 | 0,119  | 2 | 0,607 | 0,669 | Do Not Test |

A result of "Do Not Test" occurs for a comparison when no significant difference is found between two means that enclose that comparison. For example, if you had four means sorted in order, and found no difference between means 4 vs. 2, then you would not test 4 vs. 3 and 3 vs. 2, but still test 4 vs. 1 and 3 vs. 1 (4 vs. 3 and 3 vs. 2 are enclosed by 4 vs. 2: 4 3 2 1). Note that not testing the enclosed means is a procedural rule, and a result of Do Not Test should be treated as if there is no significant difference between the means, even though one may appear to exist.

## One Way Analysis of Variance

Dependent Variable: NH30

Equal Variance Test (Brown-Forsythe): Passed (P = 0,464)

| Group Name                | N | Missing | Mean  | Std Dev | SEM    |
|---------------------------|---|---------|-------|---------|--------|
| 0 ml l <sup>-1</sup> 24 h | 9 | 0       | 1,303 | 0,608   | 0,203  |
| 0 ml l <sup>-1</sup> 48 h | 9 | 3       | 2,503 | 0,232   | 0,0948 |
| 4 ml l <sup>-1</sup> 24 h | 9 | 0       | 1,741 | 0,324   | 0,108  |
| 4 ml l <sup>-1</sup> 48 h | 9 | 2       | 2,036 | 0,459   | 0,173  |
| 2 ml l <sup>-1</sup> 24 h | 9 | 0       | 2,272 | 0,325   | 0,108  |
| 2 ml l <sup>-1</sup> 48 h | 9 | 2       | 2,344 | 0,528   | 0,199  |
| 1 ml l <sup>-1</sup> 24 h | 9 | 0       | 2,151 | 0,239   | 0,0798 |
| 1 ml l <sup>-1</sup> 48 h | 9 | 3       | 2,732 | 0,393   | 0,160  |

| Source of Variation | DF | SS     | MS    | F     | P      |
|---------------------|----|--------|-------|-------|--------|
| Between Groups      | 7  | 10,965 | 1,566 | 9,325 | <0,001 |
| Residual            | 54 | 9,071  | 0,168 |       |        |
| Total               | 61 | 20,036 |       |       |        |

The differences in the mean values among the treatment groups are greater than would be expected by chance; there is a statistically significant difference (P = <0,001).

Power of performed test with alpha = 0,050: 1,000

All Pairwise Multiple Comparison Procedures (Duncan's Method) :

Comparisons for factor: **Treatment**

| Comparison                                          | Diff of Means | p | q     | P      | P<0,050     |
|-----------------------------------------------------|---------------|---|-------|--------|-------------|
| 1 ml l <sup>-1</sup> 48 vs. 0 ml l <sup>-1</sup> 24 | 1,428         | 8 | 9,351 | <0,001 | Yes         |
| 1 ml l <sup>-1</sup> 48 vs. 4 ml l <sup>-1</sup> 24 | 0,991         | 7 | 6,485 | <0,001 | Yes         |
| 1 ml l <sup>-1</sup> 48 vs. 4 ml l <sup>-1</sup> 48 | 0,696         | 6 | 4,316 | 0,008  | Yes         |
| 1 ml l <sup>-1</sup> 48 vs. 1 ml l <sup>-1</sup> 24 | 0,581         | 5 | 3,801 | 0,018  | Yes         |
| 1 ml l <sup>-1</sup> 48 vs. 2 ml l <sup>-1</sup> 24 | 0,459         | 4 | 3,008 | 0,056  | No          |
| 1 ml l <sup>-1</sup> 48 vs. 2 ml l <sup>-1</sup> 48 | 0,387         | 3 | 2,403 | 0,114  | Do Not Test |
| 1 ml l <sup>-1</sup> 48 vs. 0 ml l <sup>-1</sup> 48 | 0,228         | 2 | 1,365 | 0,339  | Do Not Test |
| 0 ml l <sup>-1</sup> 48 vs. 0 ml l <sup>-1</sup> 24 | 1,200         | 7 | 7,856 | <0,001 | Yes         |
| 0 ml l <sup>-1</sup> 48 vs. 4 ml l <sup>-1</sup> 24 | 0,762         | 6 | 4,990 | 0,002  | Yes         |
| 0 ml l <sup>-1</sup> 48 vs. 4 ml l <sup>-1</sup> 48 | 0,468         | 5 | 2,900 | 0,071  | No          |
| 0 ml l <sup>-1</sup> 48 vs. 1 ml l <sup>-1</sup> 24 | 0,352         | 4 | 2,306 | 0,143  | Do Not Test |
| 0 ml l <sup>-1</sup> 48 vs. 2 ml l <sup>-1</sup> 24 | 0,231         | 3 | 1,513 | 0,319  | Do Not Test |

|                                                     |        |   |       |        |             |
|-----------------------------------------------------|--------|---|-------|--------|-------------|
| 0 ml l <sup>-1</sup> 48 vs. 2 ml l <sup>-1</sup> 48 | 0,159  | 2 | 0,986 | 0,489  | Do Not Test |
| 2 ml l <sup>-1</sup> 48 vs. 0 ml l <sup>-1</sup> 24 | 1,041  | 6 | 7,127 | <0,001 | Yes         |
| 2 ml l <sup>-1</sup> 48 vs. 4 ml l <sup>-1</sup> 24 | 0,603  | 5 | 4,130 | 0,010  | Yes         |
| 2 ml l <sup>-1</sup> 48 vs. 4 ml l <sup>-1</sup> 48 | 0,309  | 4 | 1,992 | 0,206  | Do Not Test |
| 2 ml l <sup>-1</sup> 48 vs. 1 ml l <sup>-1</sup> 24 | 0,193  | 3 | 1,323 | 0,384  | Do Not Test |
| 2 ml l <sup>-1</sup> 48 vs. 2 ml l <sup>-1</sup> 24 | 0,0721 | 2 | 0,493 | 0,729  | Do Not Test |
| 2 ml l <sup>-1</sup> 24 vs. 0 ml l <sup>-1</sup> 24 | 0,969  | 5 | 7,092 | <0,001 | Yes         |
| 2 ml l <sup>-1</sup> 24 vs. 4 ml l <sup>-1</sup> 24 | 0,531  | 4 | 3,888 | 0,013  | Yes         |
| 2 ml l <sup>-1</sup> 24 vs. 4 ml l <sup>-1</sup> 48 | 0,237  | 3 | 1,619 | 0,287  | Do Not Test |
| 2 ml l <sup>-1</sup> 24 vs. 1 ml l <sup>-1</sup> 24 | 0,121  | 2 | 0,886 | 0,534  | Do Not Test |
| 1 ml l <sup>-1</sup> 24 vs. 0 ml l <sup>-1</sup> 24 | 0,848  | 4 | 6,205 | <0,001 | Yes         |
| 1 ml l <sup>-1</sup> 24 vs. 4 ml l <sup>-1</sup> 24 | 0,410  | 3 | 3,001 | 0,049  | Yes         |
| 1 ml l <sup>-1</sup> 24 vs. 4 ml l <sup>-1</sup> 48 | 0,115  | 2 | 0,790 | 0,579  | Do Not Test |
| 4 ml l <sup>-1</sup> 48 vs. 0 ml l <sup>-1</sup> 24 | 0,732  | 3 | 5,015 | 0,001  | Yes         |
| 4 ml l <sup>-1</sup> 48 vs. 4 ml l <sup>-1</sup> 24 | 0,295  | 2 | 2,017 | 0,160  | No          |
| 4 ml l <sup>-1</sup> 24 vs. 0 ml l <sup>-1</sup> 24 | 0,438  | 2 | 3,204 | 0,028  | Yes         |

A result of "Do Not Test" occurs for a comparison when no significant difference is found between two means that enclose that comparison. For example, if you had four means sorted in order, and found no difference between means 4 vs. 2, then you would not test 4 vs. 3 and 3 vs. 2, but still test 4 vs. 1 and 3 vs. 1 (4 vs. 3 and 3 vs. 2 are enclosed by 4 vs. 2: 4 3 2 1). Note that not testing the enclosed means is a procedural rule, and a result of Do Not Test should be treated as if there is no significant difference between the means, even though one may appear to exist.

## One Way Analysis of Variance

Dependent Variable: YUCCA6

Equal Variance Test (Brown-Forsythe): Passed (P = 0,829)

| Group Name                | N | Missing | Mean  | Std Dev | SEM   |
|---------------------------|---|---------|-------|---------|-------|
| 0 ml l <sup>-1</sup> 24 h | 9 | 0       | 1,189 | 0,519   | 0,173 |
| 0 ml l <sup>-1</sup> 48 h | 9 | 0       | 1,258 | 0,562   | 0,187 |
| 4 ml l <sup>-1</sup> 24 h | 9 | 0       | 1,503 | 0,607   | 0,202 |
| 4 ml l <sup>-1</sup> 48 h | 9 | 0       | 2,087 | 0,682   | 0,227 |
| 2 ml l <sup>-1</sup> 24 h | 9 | 0       | 2,126 | 0,567   | 0,189 |
| 2 ml l <sup>-1</sup> 48 h | 9 | 0       | 1,688 | 0,352   | 0,117 |
| 1 ml l <sup>-1</sup> 24 h | 9 | 3       | 2,937 | 0,541   | 0,221 |
| 1 ml l <sup>-1</sup> 48 h | 9 | 0       | 1,977 | 0,548   | 0,183 |

| Source of Variation | DF | SS     | MS    | F     | P      |
|---------------------|----|--------|-------|-------|--------|
| Between Groups      | 7  | 16,639 | 2,377 | 7,723 | <0,001 |
| Residual            | 61 | 18,775 | 0,308 |       |        |
| Total               | 68 | 35,414 |       |       |        |

The differences in the mean values among the treatment groups are greater than would be expected by chance; there is a statistically significant difference (P = <0,001).

Power of performed test with alpha = 0,050: 1,000

All Pairwise Multiple Comparison Procedures (Duncan's Method) :

Comparisons for factor: **Treatment**

| Comparison                                          | Diff of Means | p | q     | P      | P<0,050     |
|-----------------------------------------------------|---------------|---|-------|--------|-------------|
| 1 ml l <sup>-1</sup> 24 vs. 0 ml l <sup>-1</sup> 24 | 1,748         | 8 | 8,453 | <0,001 | Yes         |
| 1 ml l <sup>-1</sup> 24 vs. 0 ml l <sup>-1</sup> 48 | 1,679         | 7 | 8,120 | <0,001 | Yes         |
| 1 ml l <sup>-1</sup> 24 vs. 4 ml l <sup>-1</sup> 24 | 1,433         | 6 | 6,932 | <0,001 | Yes         |
| 1 ml l <sup>-1</sup> 24 vs. 2 ml l <sup>-1</sup> 48 | 1,249         | 5 | 6,040 | <0,001 | Yes         |
| 1 ml l <sup>-1</sup> 24 vs. 1 ml l <sup>-1</sup> 48 | 0,960         | 4 | 4,643 | 0,003  | Yes         |
| 1 ml l <sup>-1</sup> 24 vs. 4 ml l <sup>-1</sup> 48 | 0,850         | 3 | 4,111 | 0,007  | Yes         |
| 1 ml l <sup>-1</sup> 24 vs. 2 ml l <sup>-1</sup> 24 | 0,811         | 2 | 3,923 | 0,007  | Yes         |
| 2 ml l <sup>-1</sup> 24 vs. 0 ml l <sup>-1</sup> 24 | 0,937         | 7 | 5,065 | 0,002  | Yes         |
| 2 ml l <sup>-1</sup> 24 vs. 0 ml l <sup>-1</sup> 48 | 0,868         | 6 | 4,693 | 0,004  | Yes         |
| 2 ml l <sup>-1</sup> 24 vs. 4 ml l <sup>-1</sup> 24 | 0,622         | 5 | 3,365 | 0,036  | Yes         |
| 2 ml l <sup>-1</sup> 24 vs. 2 ml l <sup>-1</sup> 48 | 0,438         | 4 | 2,367 | 0,132  | No          |
| 2 ml l <sup>-1</sup> 24 vs. 1 ml l <sup>-1</sup> 48 | 0,149         | 3 | 0,805 | 0,596  | Do Not Test |

|                                                     |        |   |       |       |             |
|-----------------------------------------------------|--------|---|-------|-------|-------------|
| 2 ml l <sup>-1</sup> 24 vs. 4 ml l <sup>-1</sup> 48 | 0,0389 | 2 | 0,210 | 0,882 | Do Not Test |
| 4 ml l <sup>-1</sup> 48 vs. 0 ml l <sup>-1</sup> 24 | 0,898  | 6 | 4,855 | 0,003 | Yes         |
| 4 ml l <sup>-1</sup> 48 vs. 0 ml l <sup>-1</sup> 48 | 0,829  | 5 | 4,482 | 0,005 | Yes         |
| 4 ml l <sup>-1</sup> 48 vs. 4 ml l <sup>-1</sup> 24 | 0,583  | 4 | 3,154 | 0,044 | Yes         |
| 4 ml l <sup>-1</sup> 48 vs. 2 ml l <sup>-1</sup> 48 | 0,399  | 3 | 2,157 | 0,155 | Do Not Test |
| 4 ml l <sup>-1</sup> 48 vs. 1 ml l <sup>-1</sup> 48 | 0,110  | 2 | 0,595 | 0,676 | Do Not Test |
| 1 ml l <sup>-1</sup> 48 vs. 0 ml l <sup>-1</sup> 24 | 0,788  | 5 | 4,260 | 0,008 | Yes         |
| 1 ml l <sup>-1</sup> 48 vs. 0 ml l <sup>-1</sup> 48 | 0,719  | 4 | 3,887 | 0,013 | Yes         |
| 1 ml l <sup>-1</sup> 48 vs. 4 ml l <sup>-1</sup> 24 | 0,473  | 3 | 2,560 | 0,092 | No          |
| 1 ml l <sup>-1</sup> 48 vs. 2 ml l <sup>-1</sup> 48 | 0,289  | 2 | 1,562 | 0,274 | Do Not Test |
| 2 ml l <sup>-1</sup> 48 vs. 0 ml l <sup>-1</sup> 24 | 0,499  | 4 | 2,698 | 0,086 | No          |
| 2 ml l <sup>-1</sup> 48 vs. 0 ml l <sup>-1</sup> 48 | 0,430  | 3 | 2,325 | 0,126 | Do Not Test |
| 2 ml l <sup>-1</sup> 48 vs. 4 ml l <sup>-1</sup> 24 | 0,184  | 2 | 0,997 | 0,483 | Do Not Test |
| 4 ml l <sup>-1</sup> 24 vs. 0 ml l <sup>-1</sup> 24 | 0,314  | 3 | 1,700 | 0,263 | Do Not Test |
| 4 ml l <sup>-1</sup> 24 vs. 0 ml l <sup>-1</sup> 48 | 0,246  | 2 | 1,328 | 0,352 | Do Not Test |
| 0 ml l <sup>-1</sup> 48 vs. 0 ml l <sup>-1</sup> 24 | 0,0689 | 2 | 0,373 | 0,793 | Do Not Test |

A result of "Do Not Test" occurs for a comparison when no significant difference is found between two means that enclose that comparison. For example, if you had four means sorted in order, and found no difference between means 4 vs. 2, then you would not test 4 vs. 3 and 3 vs. 2, but still test 4 vs. 1 and 3 vs. 1 (4 vs. 3 and 3 vs. 2 are enclosed by 4 vs. 2: 4 3 2 1). Note that not testing the enclosed means is a procedural rule, and a result of Do Not Test should be treated as if there is no significant difference between the means, even though one may appear to exist.
